# Supplementary material
Source: HighWire-hosted journal article supplement (https://www.cmaj.ca/highwire/filestream/58519/field_highwire_adjunct_files/0/edit-detsky-1-at.pdf)
Supplement: edit-detsky-1-at.pdf [file edit-detsky-1-at.pdf]

## Appendix 1: References for the editorial “Reducing lifelong disability from sports injuries in children”

### References

1. Haché A. Analysis of the NHL players by country of birth. Moncton (NB): Université de Moncton; 2006. Available: [www.thephysicsofhockey.com/documents/country.pdf](http://www.thephysicsofhockey.com/documents/country.pdf) (accessed 2011 Apr. 14).
2. Tator CH. *Catastrophic injuries in sports and recreation: causes and prevention — a Canadian study*. Toronto (ON): University of Toronto Press; 2008.
3. Hockey injuries. *Ontario Injury Compass* 2006;3(1). Available: [www.oninjuryresources.ca/downloads/Compass/2006/2006-01-OICompass-hockey.pdf](http://www.oninjuryresources.ca/downloads/Compass/2006/2006-01-OICompass-hockey.pdf) (accessed 2011 June 2).
4. Emery CA, Kang J, Shrier I, et al. Risk of injury associated with body checking among youth ice hockey players. *JAMA* 2010;303:2265-72.
5. Williamson IJ, Goodman D. Converging evidence for the under-reporting of concussions in youth ice hockey. *Br J Sports Med* 2006;40:128-32.
6. Ackery A, Provvidenza C, Tator CH. Concussion in hockey: compliance with return to play advice and follow-up status. *Can J Neurol Sci* 2009;36:207-12.
